# Supplementary material for: Facile synthesis of CeO2-decorated W@Co-MOF heterostructures as a highly active and durable electrocatalyst for overall water splitting
Source: Royal Society of Chemistry journal article supplement (doi:10.1039/d4cp01350f), 2024-01-01
Supplement: d4cp01350f1.pdf [file d4cp01350f1.pdf]

# Facile synthesis of CeO<sub>2</sub>-decorated W@Co-MOF heterostructures as a highly active and durable electrocatalyst for overall water splitting

Chang Su<sup>a</sup>, Dan Wang<sup>b</sup>, Wenchang Wang<sup>b,c</sup>, Naotoshi Mitsuzaki<sup>d</sup>, Zhidong Chen<sup>\*a,b</sup>

<sup>a</sup> School of Materials Science and Engineering, Changzhou University, Changzhou, 213164, Jiangsu, China.

<sup>b</sup> Jiangsu Key Laboratory of Advanced Catalytic Materials and Technology, School of Petrochemical Engineering, Changzhou University, Changzhou 213164, China.

<sup>c</sup> Analysis and Testing Center, NERC Biomass of Changzhou University, Changzhou, Jiangsu, 213032, China.

<sup>d</sup> Qualtec Co., Ltd, Osaka, 590-0906, Japan

Corresponding author E-mail : \*Z. Chen: [zdchen@cczu.edu.cn](mailto:zdchen@cczu.edu.cn),

## **Materials and Reagents**

The cobalt nitrate hexahydrate ( $\text{Co}(\text{NO}_3)_2 \cdot 6\text{H}_2\text{O}$ ), Cerium nitrate hexahydrate ( $\text{Ce}(\text{NO}_3)_3 \cdot 6\text{H}_2\text{O}$ ) and sodium carbonate ( $\text{Na}_2\text{CO}_3$ ) were obtained from Sinopharm Chemical Reagent Co. Ltd. The 2-aminoterephthalic acid (2-NH<sub>2</sub>-BDC) and Sodium metatungstate ( $\text{Na}_6\text{W}_{12}\text{O}_{39} \cdot x\text{H}_2\text{O}$ ) were purchased from Sigma-Aldrich Co. Ltd. The potassium hydroxide (KOH) and N,N-dimethylformamide (DMF) were purchased from Shanghai Maclean Biochemical Technology Co., Ltd. Besides, ultrapure water (18.2 M $\Omega$ ) was utilized throughout the whole experiment. The purity of all reagents more than 99%.

## **Materials characterization**

The morphologies and microstructures of the prepared products were tested by scanning electron microscope (SEM, JSM-6360LA, Japan) and transmission electron microscopy (TEM, JEM-2010, Japan). The X-ray diffraction (XRD) was used to identify the crystal phases of products on the Max-2000 (Rigaku Co., Ltd., Japan) and X-ray photoelectron spectroscopy (XPS) can be used to analyze the elemental chemical states of the catalyst materials on the AXIS-Ultra DLD (Shimazu, Japan). The surface pore size adsorption instrument was used to calculate the specific surface area and pore size distribution of the material.

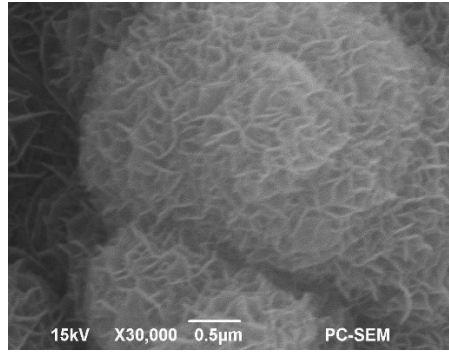

**Fig. S1.** The SEM images of Co-MOF/NF.

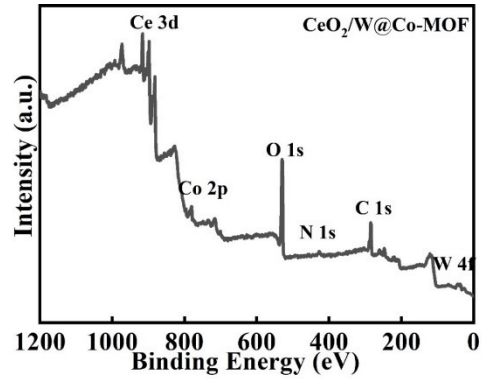

**Fig. S2.** XPS full spectrum image of CeO<sub>2</sub>/W@Co-MOF/NF

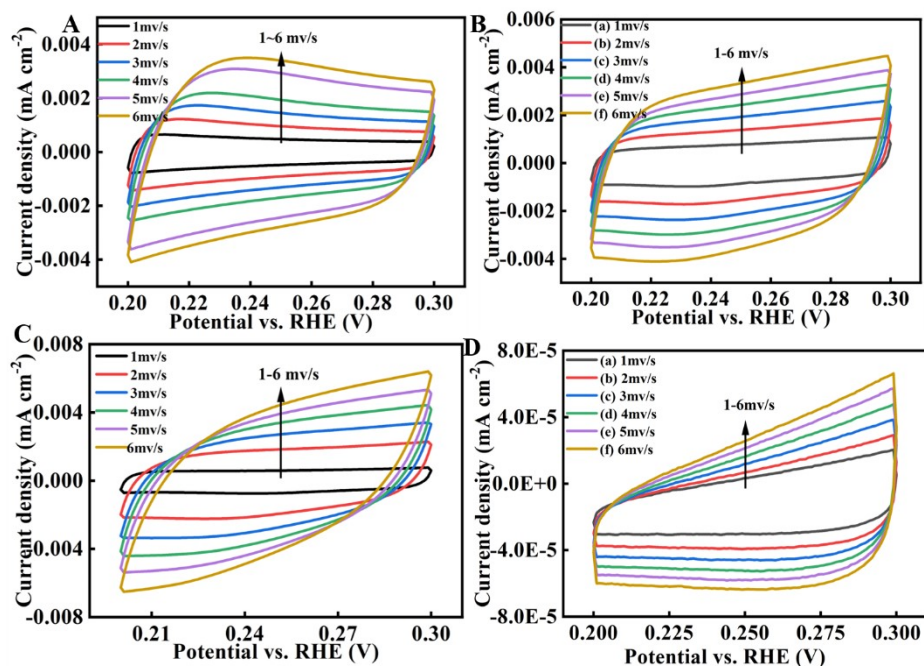

**Fig. S3.** CV curves of various electrodes in the potential window from 0.05 to 0.15 V (vs. RHE) at 1, 2, 3, 4, 5 and 6 mV s<sup>-1</sup>: (A) Co-MOF/NF, (B) W@Co-MOF/NF, (C) CeO<sub>2</sub>/W@Co-MOF/NF and (D) CeO<sub>2</sub>/NF.

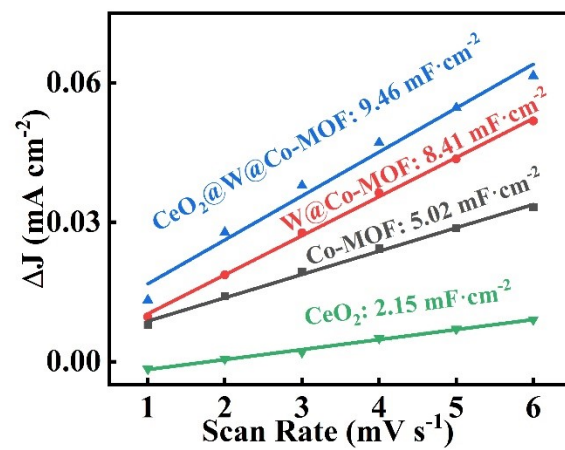

Fig. S4. Double-layer capacitances ( $C_{dl}$ ) of the four samples derived from the cyclic voltammograms.

**Table S1.** Comparison of OER activity at 10 mA cm<sup>-2</sup> and stability of various MOF-based catalysts.

| Catalyst                                                                     | $\eta_{10}/\text{mV}$ | Tafel slope/<br>$\text{mV dec}^{-1}$ | Electrolyte   | Reference        |
|------------------------------------------------------------------------------|-----------------------|--------------------------------------|---------------|------------------|
| <b>CeO<sub>2</sub>/W@Co-MOF/NF</b>                                           | <b>239</b>            | <b>29.39</b>                         | <b>1M KOH</b> | <b>This work</b> |
| Ce/Cu-MOF/GO                                                                 | 386                   | 98.1                                 | 1M KOH        | 1                |
| Co/CoS <sub>2</sub> @NC                                                      | 349                   | 237.8                                | 1M KOH        | 2                |
| Co/CoP@HOMC                                                                  | 260                   | 151                                  | 1M KOH        | 3                |
| Hollow CoS <sub>2</sub> -MoS <sub>2</sub>                                    | 266                   | 104                                  | 1M KOH        | 4                |
| FeCo-P                                                                       | 240                   | 38.24                                | 1M KOH        | 5                |
| Fe-Co-Ni MOF                                                                 | 254                   | 51.3                                 | 1M KOH        | 6                |
| (Ni <sub>2</sub> Co <sub>1</sub> ) <sub>0.925</sub> Fe <sub>0.075</sub> -MOF | 257                   | 41.3                                 | 1M KOH        | 7                |
| Co-BPDC/Co-BDC-3                                                             | 335                   | 72.1                                 | 1M KOH        | 8                |
| Co-Ni@HPA-MOF                                                                | 320                   | 58                                   | 1M KOH        | 9                |
| BaTiO <sub>3</sub> @MOF-Fe/Co                                                | 247                   | 38.4                                 | 1M KOH        | 10               |

**Table S2.** Comparison of HER activity at 10 mA cm<sup>-2</sup> and stability of various Co-based MOFs catalysts.

| Catalyst                           | $\eta_{10}/\text{mV}$ | Tafel slope/<br>mV dec <sup>-1</sup> | Electrolyte   | Reference        |
|------------------------------------|-----------------------|--------------------------------------|---------------|------------------|
| <b>CeO<sub>2</sub>/W@Co-MOF/NF</b> | <b>87</b>             | <b>32.25</b>                         | <b>1M KOH</b> | <b>This work</b> |
| Co-Fe-P/CeO <sub>2</sub>           | 320                   | 69.7                                 | 1M KOH        | 11               |
| Co/CoS <sub>2</sub> @NC            | 188                   | 54.9                                 | 1M KOH        | 2                |
| Co/CoP@HOMC                        | 120                   | 78                                   | 1M KOH        | 3                |
| FeCo-P                             | 131                   | 89.9                                 | 1M KOH        | 5                |
| NiCo-MOF-P                         | 195                   | 105                                  | 1M KOH        | 12               |
| MXene@Ce-MOF                       | 220                   | 149.9                                | 1M KOH        | 13               |
| Fe-MOF@MoS <sub>2</sub>            | 118                   | 68                                   | 1M KOH        | 14               |



**Table S3.** Comparison of overall water splitting at 10 mA cm<sup>-2</sup> and stability of various Co-based MOFs catalysts.

| <b>Catalyst</b>                    | <b>Volatage/<br/>V</b> | <b>Electrolyte</b> | <b>Reference</b> |
|------------------------------------|------------------------|--------------------|------------------|
| <b>CeO<sub>2</sub>/W@Co-MOF/NF</b> | <b>1.54</b>            | <b>1M KOH</b>      | <b>This work</b> |
| NiFe-MOF-5                         | 1.57                   | 1M KOH             | 15               |
| Fe-Co-Ni-MOF                       | 1.60                   | 1M KOH             | 6                |
| FeCo-P                             | 1.47                   | 1M KOH             | 16               |
| CoNiP/NF                           | 1.62                   | 1M KOH             | 17               |
| FeCoMnNi-MOF-74/NF                 | 1.62                   | 1M KOH             | 18               |
| Co,Fe-MOF-74/Co/CC                 | 1.65                   | 1M KOH             | 19               |

## Notes and references

1. Y. Chen, N. Huang and Y. Liang, *Ionics*, 2021, **27**, 4347-4360.
2. G. Gao, B. Fang, Z. Ding, W. Dong, Y.-X. Li, X. L. Wang and Y.-F. Yao, *International Journal of Hydrogen Energy*, 2023, **48**, 1831-1841.
3. W. Li, J. Liu, P. Guo, H. Li, B. Fei, Y. Guo, H. Pan, D. Sun, F. Fang and R. Wu, *Advanced Energy Materials*, 2021, **11**.
4. Y. Li, W. Wang, B. Huang, Z. Mao, R. Wang, B. He, Y. Gong and H. Wang, *Journal of Energy Chemistry*, 2021, **57**, 99-108.
5. H. Jiang, Z. Zhao, G. Li, M. Wang, P. Chen, X. Liu, X. Tu, Y. Hu, Z. Shen and Y. Wu, *Advanced Science*, 2023, **11**.
6. F. Shahbazi Farahani, M. S. Rahmanifar, A. Noori, M. F. El-Kady, N. Hassani, M. Neek-Amal, R. B. Kaner and M. F. Mousavi, *Journal of the American Chemical Society*, 2022, **144**, 3411-3428.
7. Q. Qian, Y. Li, Y. Liu, L. Yu and G. Zhang, *Adv Mater*, 2019, **31**, e1901139.
8. Q. Zha, F. Yuan, G. Qin and Y. Ni, *Inorg Chem*, 2020, **59**, 1295-1305.
9. M. Lu, Y. Li, P. He, J. Cong, D. Chen, J. Wang, Y. Wu, H. Xu, J. Gao and J. Yao, *Journal of Solid State Chemistry*, 2019, **272**, 32-37.
10. S. Wang, Q. Li, S. Sun, K. Ge, Y. Zhao, K. Yang, Z. Zhang, J. Cao, J. Lu, Y. Yang, Y. Zhang, M. Pan, Z. Lin and L. Zhu, *Journal of Materials Chemistry A*, 2022, **10**, 5350-5360.
11. Y. Hu, F. Li, Y. Long, H. Yang, L. Gao, X. Long, H. Hu, N. Xu, J. Jin and J. Ma, *Journal of Materials Chemistry A*, 2018, **6**, 10433-10440.
12. M. M. Rajpure, H. A. Bandal, H. S. Jadhav and H. Kim, *Journal of Electroanalytical Chemistry*, 2022, **923**, 116825.
13. S. Li, H. Chai, L. Zhang, Y. Xu, Y. Jiao and J. Chen, *Journal of Colloid and Interface Science*, 2023, **642**, 235-245.
14. R. Velayutham, C. J. Raj, H. M. Jang, W. J. Cho, K. Palanisamy, C. Kaya and B. C. Kim, *Materials Today Nano*, 2023, **24**.
15. Q. Mou, Z. Xu, G. Wang, E. Li, J. Liu, P. Zhao, X. Liu, H. Li and G. Cheng, *Inorganic Chemistry Frontiers*, 2021, **8**, 2889-2899.
16. D. Ji, S. Peng, L. Fan, L. Li, X. Qin and S. Ramakrishna, *Journal of Materials Chemistry A*, 2017, **5**, 23898-23908.
17. H. Liu, R. Huang, W. Chen, Y. Zhang, M. Wang, Y. Hu, Y. Zhou and Y. Song, *Applied Surface Science*, 2021, **569**.
18. M. Zhang, W. Xu, T. Li, H. Zhu and Y. Zheng, *Inorganic Chemistry*, 2020, **59**, 15467-15477.
19. Q. Zha, M. Li, Z. Liu and Y. Ni, *ACS Sustainable Chemistry & Engineering*, 2020, **8**, 12025-12035.
